# Supplementary material for: Computational Model of MicroRNA Control of HIF-VEGF Pathway: Insights into the Pathophysiology of Ischemic Vascular Disease and Cancer
Source: PLOS journal article supplement (doi:10.1371/journal.pcbi.1004612), 2015-11-20
Supplement: S4 (10.1371/journal.pcbi.1004612.s004) [file journal.pcbi.1004612.s004]

## S2\_Fig

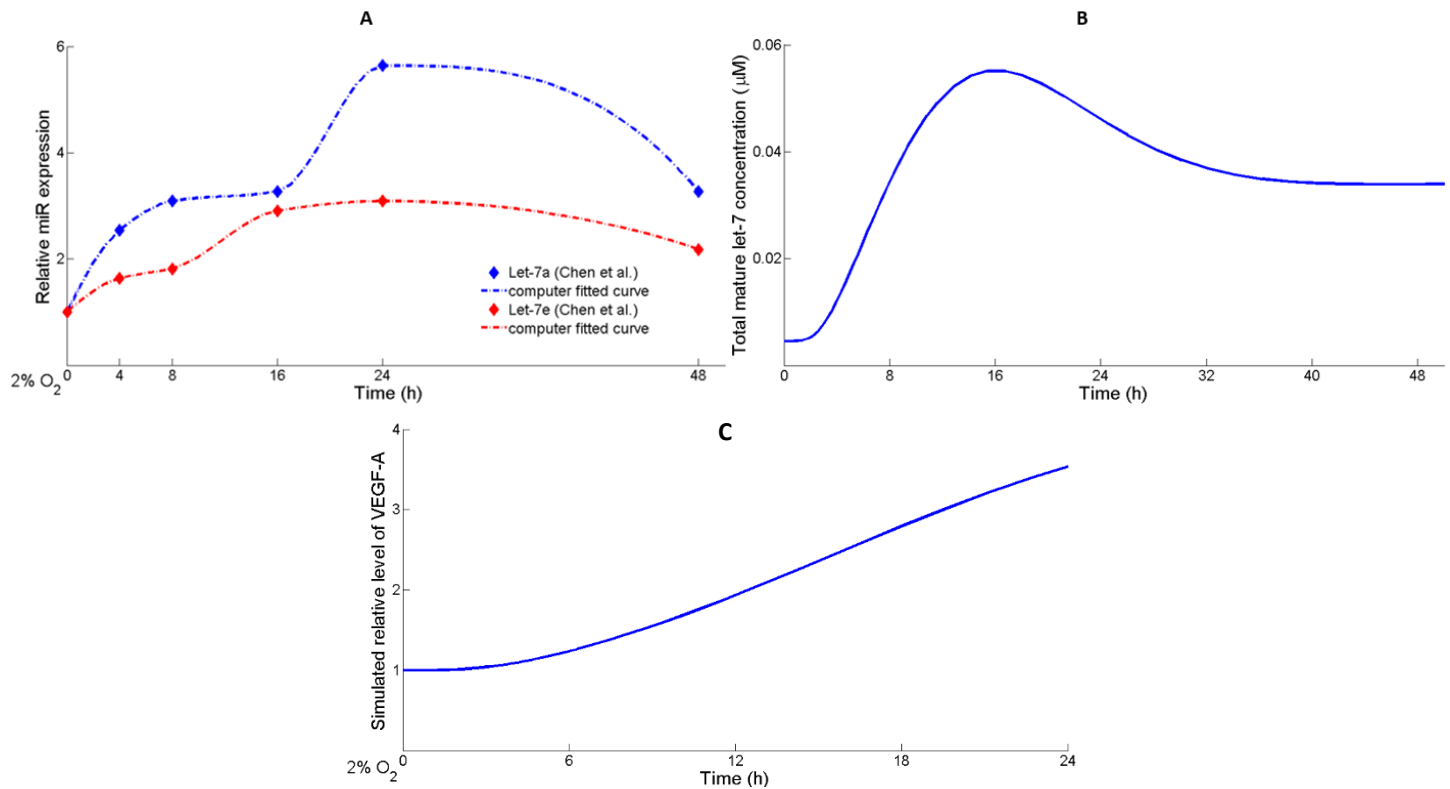

**S2\_Fig. Experimental time course profiles of let-7 and model simulations of intracellular let-7, VEGF in hypoxia.** (A) Experimental quantification of total mature let-7s induced in 2% oxygen in endothelial cell by Chen et al. at discrete time points; values (symbols) are normalized to initial expression and dashed curves are computer interpolated trajectories [1]. (B) In agreement with the trend shown in the experimental data, model simulation predicts an initial steep rise and a subsequent drop in total let-7 level due in 2% oxygen. (C) Model simulation of intracellular VEGF predicts a 3.5 fold induction (relative to the normoxic baseline level) in response to a 24-hour exposure to 2% O<sub>2</sub>.

## References

1. Chen Z, Lai TC, Jan YH, Lin FM, Wang WC, Xiao H, et al. Hypoxia-responsive miRNAs target argonaute 1 to promote angiogenesis. *The Journal of clinical investigation*. 2013;123(3):1057-67. doi: 10.1172/JCI65344. PubMed PMID: 23426184; PubMed Central PMCID: PMC3582133.
