# Supplementary material for: Computational Model of MicroRNA Control of HIF-VEGF Pathway: Insights into the Pathophysiology of Ischemic Vascular Disease and Cancer
Source: PLOS journal article supplement (doi:10.1371/journal.pcbi.1004612), 2015-11-20
Supplement: S8 (10.1371/journal.pcbi.1004612.s008) [file journal.pcbi.1004612.s008]

## S6\_Fig

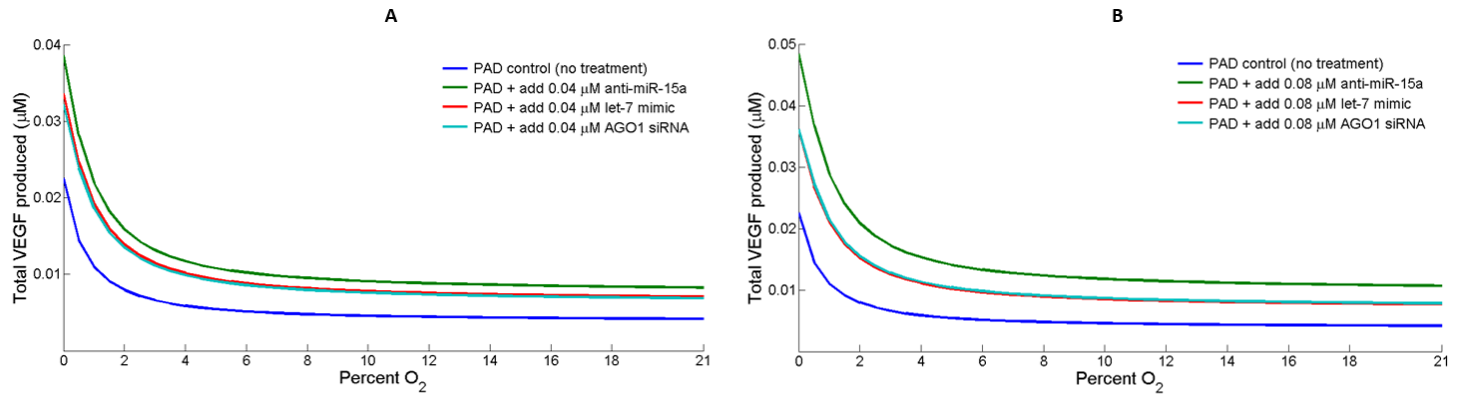

**S6\_Fig. Comparison between different treatments for PAD *in silico*.** (A) Measurement of total VEGF produced in a 24-hour span in response to 0.04 μM of each treatment, and (B) 0.08 μM of each treatment. Since antagonizing miR-15a immediately releases VEGF mRNA from the miR-15a RISC while the other two strategies exert their effect indirectly, miR-15a antagonist is more effective in stimulating VEGF synthesis compared to let-7 mimic or AGO1 siRNA, at the same dose level in a simulated PAD environment.
